# Supplementary material for: Fluoride Concentration in Urine after Supplementation with Quelites in a Population of Adolescents
Source: MDPI journal article supplement (doi:10.3390/foods11193071), 2022-10-03
Supplement: s1 [file s1]

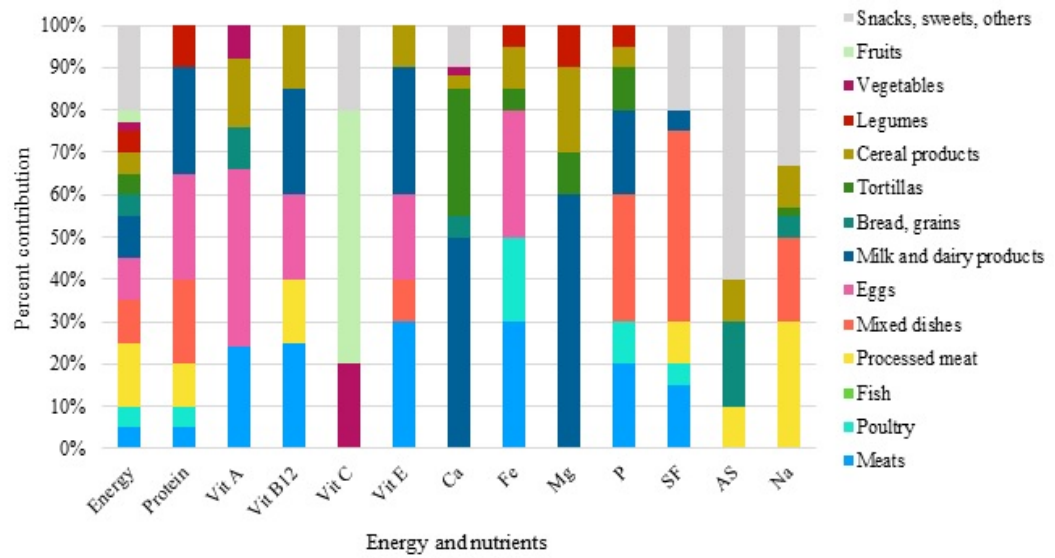

**Figure S1.** Contribution of food sources in the daily intake of energy, macronutrients, micronutrients and critical nutrients, in participants included in the study. Each color represents a different food source. Vitamin (Vit); Calcium (Ca); Iron (Fe); Magnesium (Mg); phosphorus (P); Sodium (Na); Saturated Fat (SF); Added sugars (AS).

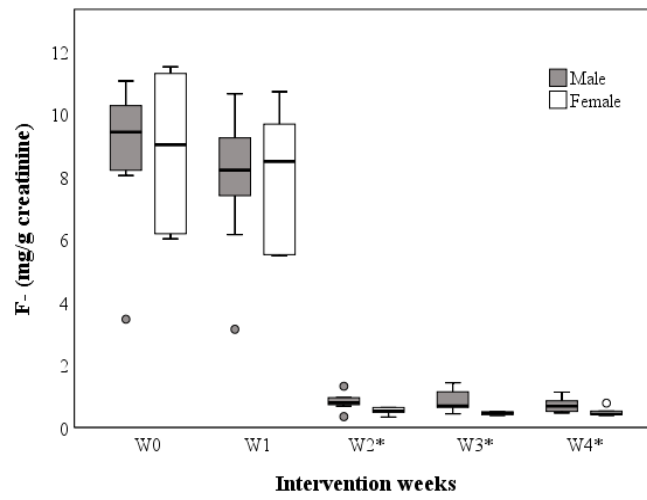

(a)

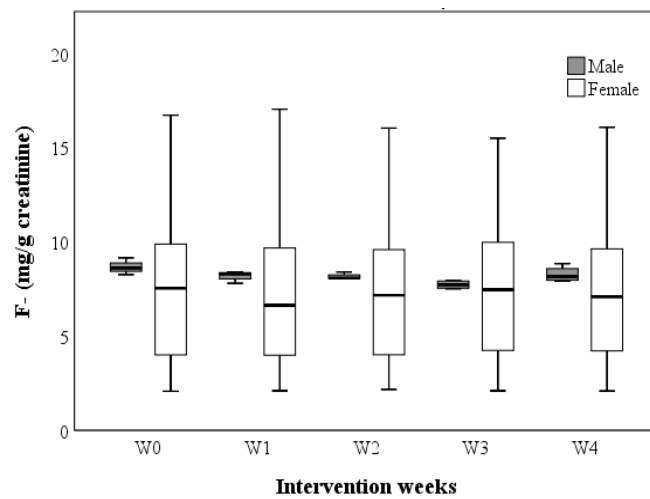

(b)

**Figure S2.** Comparison of the concentration of F<sup>-</sup> (median) by sex. (a) Treated group; (b) Untreated group. W0: baseline; W1: week 1; W2: week 2; W3: week 3; W4: week 4. \*Statistically significant difference by sex according to the Mann-Whitney U test with  $p < 0.05$

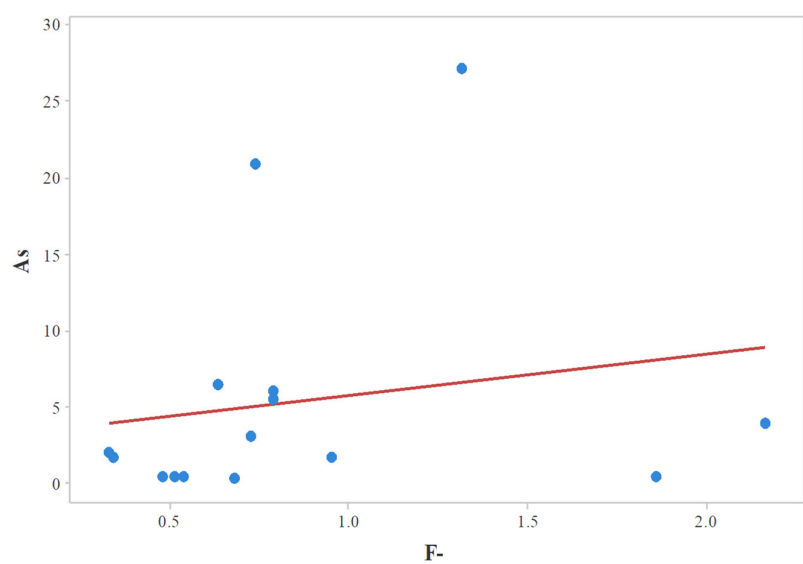

**Figure S3.** Scatterplot of  $As$  concentration (y-axis) vs. concentration of  $F^-$  (x-axis) excreted in urine at week 2 of treatment. No correlation was found between the variables.
